# Supplementary material for: Exhausting T Cells During HIV Infection May Improve the Prognosis of Patients with COVID-19
Source: Frontiers journal article supplement (doi:10.3389/fcimb.2021.564938), 2021-09-27
Supplement: Data_Sheet_1.PDF [file Data_Sheet_1.PDF]

## Supplementary materials

**e-Table 1. Criteria for clinical severity of confirmed coronavirus disease 2019 (COVID-19) \***

| <b>Types</b>    | <b>Definition</b>                                                                                                                                                                                                                                                                                                                                                                        |
|-----------------|------------------------------------------------------------------------------------------------------------------------------------------------------------------------------------------------------------------------------------------------------------------------------------------------------------------------------------------------------------------------------------------|
| <b>Mild</b>     | Mild clinical symptoms [fever $<38^{\circ}\text{C}$ (quelled without treatment), with or without cough, no dyspnea, no gasping, no chronic disease] No imaging findings of pneumonia                                                                                                                                                                                                     |
| <b>Moderate</b> | Fever, respiratory symptoms, imaging findings of pneumonia                                                                                                                                                                                                                                                                                                                               |
| <b>Severe</b>   | Meet any of the followings: <ul style="list-style-type: none"> <li>• Respiratory distress, RR <math>\geq 30</math> times/min</li> <li>• SpO<sub>2</sub> <math>&lt;93\%</math> at rest</li> <li>• PaO<sub>2</sub>/FiO<sub>2</sub> <math>\leq 300\text{mmHg}</math></li> <li>• d. Patients showing a rapid progression (<math>&gt;50\%</math>) on CT imaging within 24-48 hours</li> </ul> |
| <b>Critical</b> | Meet any of the followings: <ul style="list-style-type: none"> <li>• Respiratory failure, need mechanical assistance</li> <li>• Multiple organ failure, intensive care unit (ICU) is needed</li> <li>• Shock</li> </ul>                                                                                                                                                                  |

RR = respiratory rate; SpO<sub>2</sub>: oxygen saturation; PaO<sub>2</sub>: partial pressure of oxygen; FiO<sub>2</sub>: fraction of inspired oxygen.

\*according to the Guidance for Corona Virus Disease 2019 (6th edition) released by the National Health Commission of China
